# Supplementary material for: Ultrasonication-Tailored Graphene Oxide of Varying Sizes in Multiple-Equilibrium-Route-Enhanced Adsorption for Aqueous Removal of Acridine Orange
Source: MDPI journal article supplement (doi:10.3390/molecules28104179), 2023-05-18
Supplement: s1 [file s1]

# Ultrasonication-Tailored Graphene Oxide of Varying Sizes in Multiple-Equilibrium-Route-Enhanced Adsorption for Aqueous Removal of Acridine Orange

Zhaoyang Han <sup>1</sup>, Ling Sun <sup>1,2,\*</sup>, Yingying Chu <sup>1</sup>, Jing Wang <sup>1</sup>, Chenyu Wei <sup>1</sup>, Yifang Liu <sup>1</sup>, Qianlei Jiang <sup>1</sup>, Changbao Han <sup>1</sup>, Hui Yan <sup>1</sup> and Xuemei Song <sup>1</sup>

<sup>1</sup> Key Laboratory of Advanced Functional Materials, Institute of Advanced Energy Materials and Devices, Ministry of Education, Faculty of Materials and Manufacturing, Beijing University of Technology, Beijing 100124, China

<sup>2</sup> Beijing Guyue New Materials Research Institute, Beijing University of Technology, Beijing 100124, China

\* Correspondence: sunling@bjut.edu.cn

**Table S1.** Fitting parameters of the pseudo-first-order and pseudo-second-order models for the adsorption kinetics of CG and EG

| Temp<br>/K | Samples  | Experimental<br>capacity<br>(mg/g) | PFO                   |                        |                | PSO                 |                            |                |
|------------|----------|------------------------------------|-----------------------|------------------------|----------------|---------------------|----------------------------|----------------|
|            |          |                                    | Q <sub>e</sub> (mg/g) | K <sub>1</sub> (1/min) | R <sup>2</sup> | Q <sub>e</sub> (mg) | K <sub>2</sub> (g /mg·min) | R <sup>2</sup> |
| 283.15     | GO       | 1024.44                            | 959.73                | 0.45                   | 0.9604         | 994.38              | 0.00114                    | 0.9682         |
|            | GOU10    | 907.04                             | 851.35                | 0.34                   | 0.9832         | 891.72              | 0.000815                   | 0.9933         |
|            | GOU30    | 948.89                             | 920.58                | 1                      | 0.9848         | 926.00              | 0.01                       | 0.9823         |
|            | GOU60    | 1062.96                            | 1024.07               | 0.42                   | 0.9932         | 1009.78             | 0.01                       | 0.9834         |
| 298.15     | GO       | 1111.85                            | 1126.70               | 0.42                   | 0.9932         | 1104.00             | 0.00263                    | 0.9868         |
|            | GOU10    | 1331.85                            | 1252.01               | 0.36                   | 0.9782         | 1200.00             | 0.00206                    | 0.9654         |
|            | GOU30    | 1278.89                            | 1287.00               | 0.43                   | 0.9988         | 1263.00             | 0.00274                    | 0.9911         |
|            | GOU60    | 1228.52                            | 1202.96               | 0.57                   | 0.9945         | 1192.00             | 0.00691                    | 0.9921         |
| 313.15     | GO       | 951.85                             | 913.97                | 0.42                   | 0.9851         | 941.38              | 0.00127                    | 0.9891         |
|            | GOU10    | 807.41                             | 792.62                | 0.62                   | 0.9749         | 811.91              | 0.00243                    | 0.9795         |
|            | GOU30    | 1193.33                            | 1208.04               | 0.58                   | 0.9931         | 1212.89             | 0.00411                    | 0.9908         |
|            | GOU60    | 1107.04                            | 1129.58               | 1.60                   | 0.9839         | 1130.17             | 0.09849                    | 0.9838         |
| 283.15     | INRGO    | 2145.19                            | /                     | /                      | /              | /                   | /                          | /              |
|            | INRGOU10 | 2054.81                            | /                     | /                      | /              | /                   | /                          | /              |
|            | INRGOU30 | 3158.15                            | /                     | /                      | /              | /                   | /                          | /              |
|            | INRGOU60 | 2320.00                            | /                     | /                      | /              | /                   | /                          | /              |
| 298.15     | INRGO    | 2152.22                            | /                     | /                      | /              | /                   | /                          | /              |
|            | INRGOU10 | 2577.78                            | /                     | /                      | /              | /                   | /                          | /              |
|            | INRGOU30 | 2284.81                            | /                     | /                      | /              | /                   | /                          | /              |

|        |          |         |   |   |   |   |   |   |
|--------|----------|---------|---|---|---|---|---|---|
|        | INRGOU60 | 3016.30 | / | / | / | / | / | / |
|        | INRGO    | 1912.96 | / | / | / | / | / | / |
| 313.15 | INRGOU10 | 1920.86 | / | / | / | / | / | / |
|        | INRGOU30 | 2440.00 | / | / | / | / | / | / |
|        | INRGOU60 | 1858.52 | / | / | / | / | / | / |

**Table S2.** Linear fitting results regarding the capacity of different-size GO as a function of sonication time.

| Parameters<br>Samples | Intercept  |                | Slope     |                | R <sup>2</sup> |
|-----------------------|------------|----------------|-----------|----------------|----------------|
|                       | Value      | Standard Error | Value     | Standard Error |                |
| 283.15 CG             | 953.31524  | 56.01518       | +1.30069  | 1.6518         | 0.2367         |
| 298.15 CG             | 1218.50786 | 83.12502       | +0.77079  | 2.45122        | 0.0471         |
| 313.15 CG             | 910.07833  | 117.50939      | +4.19317  | 3.46516        | 0.422          |
| 283.15 EG             | 2270.26548 | 434.3065       | +5.97088  | 12.807         | 0.09803        |
| 298.15 EG             | 2215.84476 | 204.86201      | +11.67731 | 6.04105        | 0.6513         |
| 313.15 EG             | 2025.80762 | 247.04644      | +0.2911   | 7.285          | 0.0007         |

**Table S3.** Fitting parameters of Langmuir, Freundlich, and Tempkin adsorption isotherms of CG.

| Temp<br>/K | Samples | Experimental capacity | Freundlich |                       |                | Langmuir              |                       |                | Tempkin                |                       |                |
|------------|---------|-----------------------|------------|-----------------------|----------------|-----------------------|-----------------------|----------------|------------------------|-----------------------|----------------|
|            |         | maximum               | n          | K <sub>L</sub> (L/mg) | R <sup>2</sup> | Q <sub>m</sub> (mg/g) | K <sub>L</sub> (L/mg) | R <sup>2</sup> | B <sub>T</sub> (KJ/ml) | A <sub>T</sub> (L/mg) | R <sup>2</sup> |
|            |         | (mg/g)                |            |                       |                |                       |                       |                |                        |                       |                |
| 283.15     | GO      | 1806.67               | 4.68       | 699.96                | 0.95           | 1850.63               | 0.04                  | 0.77           | 173.94                 | 17.75                 | 0.83           |
|            | GOU10   | 984.44                | 6.25       | 419.20                | 0.90           | 781.85                | 2.29                  | 0.81           | 90.06                  | 146.77                | 0.93           |
|            | GOU30   | 1066.67               | 7.07       | 580.12                | 0.74           | 1060.52               | 21.3                  | 0.92           | 120.78                 | 115.09                | 0.83           |
|            | GOU60   | 926.67                | 9.87       | 648.88                | 0.68           | 981.28                | 14.92                 | 0.94           | 83.46                  | 2895.16               | 0.77           |
| 298.15     | GO      | 2025.19               | 8.95       | 1039.39               | 0.88           | 1768.83               | 9.92                  | 0.87           | 143.74                 | 2754.65               | 0.95           |
|            | GOU10   | 1518.52               | 8.49       | 806.89                | 0.87           | 1378.95               | 12.21                 | 0.86           | 127.04                 | 829.91                | 0.95           |
|            | GOU30   | 1727.41               | 8.53       | 685.66                | 0.76           | 1095.59               | 10.74                 | 0.90           | 102.24                 | 1089.06               | 0.83           |
|            | GOU60   | 1848.15               | 8.91       | 669.59                | 0.74           | 1047.14               | 13.71                 | 0.90           | 93.74                  | 1734.60               | 0.82           |
| 313.15     | GO      | 897.04                | 8.96       | 559.64                | 0.79           | 899.37                | 2.25                  | 0.95           | 76.38                  | 2113.72               | 0.89           |
|            | GOU10   | 1644.44               | 9.30       | 652.32                | 0.86           | 975.16                | 64.51                 | 0.93           | 77.58                  | 9015.33               | 0.92           |
|            | GOU30   | 913.33                | 9.21       | 543.69                | 0.79           | 830.68                | 17.28                 | 0.93           | 71.99                  | 2640.40               | 0.86           |
|            | GOU60   | 1028.15               | 9.08       | 426.68                | 0.80           | 902.60                | 2.03                  | 0.95           | 109.63                 | 42.93                 | 0.87           |

**Table S4.** Fitting parameters of Freundlich, Langmuir, and Tempkin adsorption isotherms of EG.

| Temp<br>/K | Samples  | Maximum<br>experimental<br>capacity<br>(mg/g) | n    | Freundlich   |       | Langmuir     |              |       | Tempkin       |              |       |
|------------|----------|-----------------------------------------------|------|--------------|-------|--------------|--------------|-------|---------------|--------------|-------|
|            |          |                                               |      | $K_L$ (l/mg) | $R^2$ | $Q_m$ (mg/g) | $K_L$ (l/mg) | $R^2$ | $B_T$ (KJ/ml) | $A_T$ (l/mg) | $R^2$ |
| 283.15     | INRGO    | 2191.11                                       | 5.18 | 769.32       | 0.97  | 1741.89      | 0.754        | 0.77  | 175.56        | 260.85       | 0.92  |
|            | INRGOU10 | 2808.15                                       | 5.12 | 984.43       | 0.93  | 2893.37      | 0.066        | 0.72  | 227.96        | 264.69       | 0.90  |
|            | INRGOU30 | 2745.93                                       | 4.32 | 796.60       | 0.97  | 2617.07      | 0.086        | 0.77  | 243.11        | 81.19        | 0.90  |
|            | INRGOU60 | 2316.30                                       | 5.09 | 839.15       | 0.97  | 2033.12      | 0.383        | 0.87  | 203.42        | 170.94       | 0.92  |
| 298.15     | INRGO    | 2870.37                                       | 4.11 | 818.39       | 0.98  | 2732.53      | 0.114        | 0.86  | 203.42        | 170.94       | 0.95  |
|            | INRGOU10 | 2586.67                                       | 4.19 | 749.85       | 0.97  | 2546.25      | 0.088        | 0.83  | 267.91        | 65.47        | 0.92  |
|            | INRGOU30 | 3123.70                                       | 4.84 | 1022.25      | 0.96  | 3065.11      | 0.078        | 0.77  | 215.37        | 165.17       | 0.89  |
|            | INRGOU60 | 2940.00                                       | 3.36 | 641.30       | 0.99  | 2858.39      | 0.084        | 0.94  | 243.22        | 291.03       | 0.91  |
| 313.15     | INRGO    | 2200.74                                       | 4.42 | 656.82       | 0.97  | 2063.88      | 0.105        | 0.82  | 169.04        | 266.21       | 0.88  |
|            | INRGOU10 | 2481.48                                       | 3.73 | 575.23       | 0.98  | 2316.59      | 0.071        | 0.87  | 213.98        | 51.62        | 0.88  |
|            | INRGOU30 | 2374.07                                       | 3.79 | 595.34       | 0.95  | 2422.29      | 0.059        | 0.82  | 328.84        | 15.73        | 0.81  |
|            | INRGOU60 | 4322.96                                       | 1.61 | 174.92       | 0.98  | 8495.96      | 0.006        | 0.95  | 328.84        | 15.73        | 0.58  |

**Table S5.** Deconvolution of C1s XPS spectra for individual CG and EG.

| Samples  | C-C<br>(284.8 eV) | C-O<br>(286.5 eV) | C=O<br>(288.5 eV) | $\pi \rightarrow \pi^*$<br>(290.9 eV) |
|----------|-------------------|-------------------|-------------------|---------------------------------------|
| GO       | 46.8%             | 45.95%            | 6.84%             | 0.41%                                 |
| GOU10    | 56.03%            | 35.72%            | 8.14%             | 0.11%                                 |
| GOU30    | 47.56%            | 43.02%            | 8.87%             | 0.55%                                 |
| GOU60    | 55.93%            | 36.09%            | 7.92%             | 0.06%                                 |
| INRGO    | 53.82%            | 34.52%            | 10.41%            | 1.25%                                 |
| INRGOU10 | 59.28%            | 27.81%            | 11.88%            | 1.02%                                 |
| INRGOU30 | 69.19%            | 19.98%            | 10.71%            | 0.12%                                 |
| INRGOU60 | 54.92%            | 33.36%            | 10.91%            | 0.81%                                 |

**Table S6.** Isotherm adsorption behavior of the CG and EG at varying temperatures.

| Samples  | 283.15 K   | 298.15 K   | 313.15 K   |
|----------|------------|------------|------------|
| GO       | Freundlich | Tempkin    | Langmuir   |
| GOU10    | Tempkin    | Tempkin    | Langmuir   |
| GOU30    | Langmuir   | Langmuir   | Langmuir   |
| GOU60    | Langmuir   | Langmuir   | Langmuir   |
| INGGO    | Freundlich | Freundlich | Freundlich |
| INRGOU10 | Freundlich | Freundlich | Freundlich |
| INRGOU30 | Freundlich | Freundlich | Freundlich |
| INRGOU60 | Freundlich | Freundlich | Freundlich |

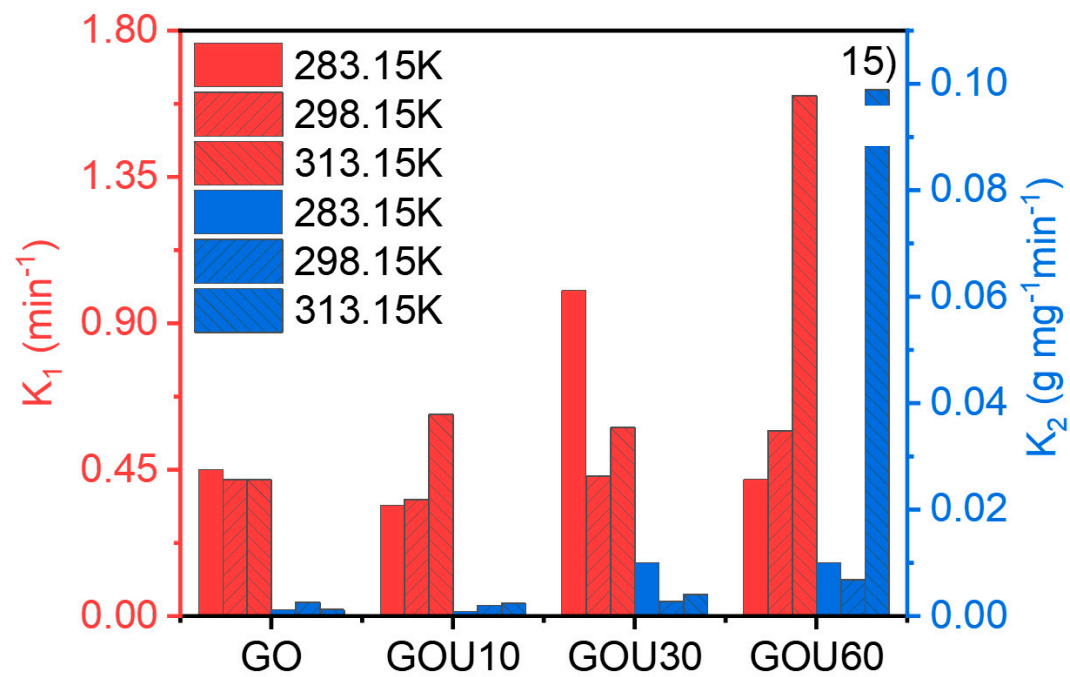

**Figure S1.** Comparison of pseudo-first-order and pseudo-second-order adsorption rate constants between control and experimental groups



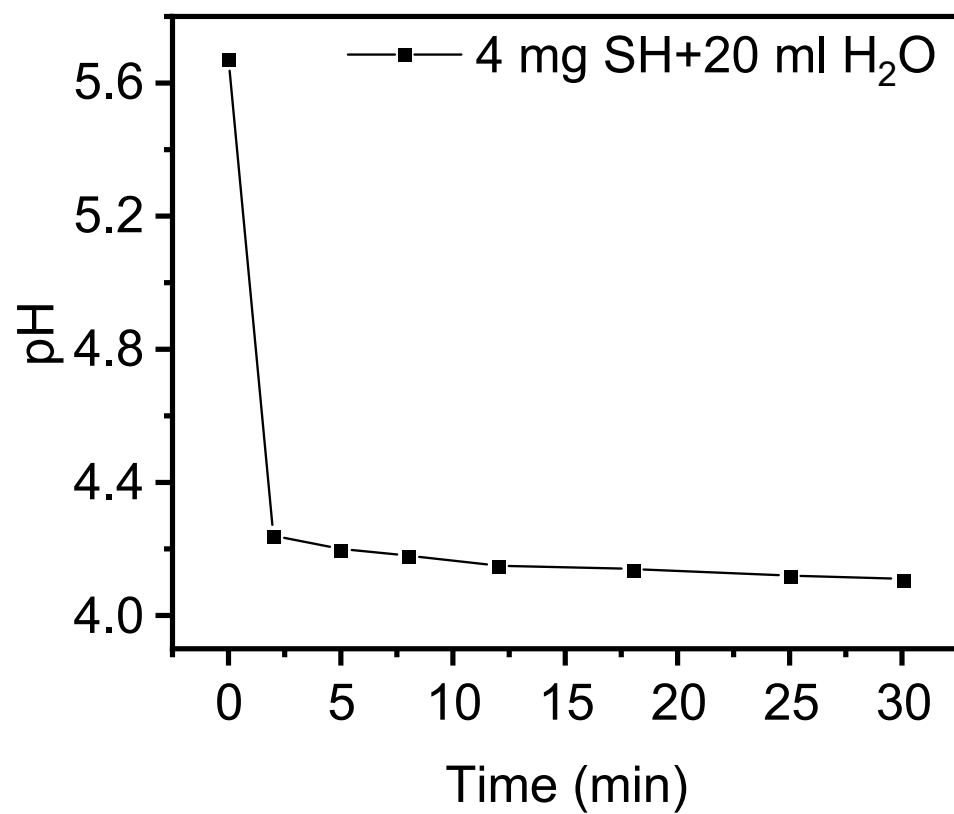

**Figure S2.** Effect of SH on the pH of aqueous solutions as a function of time

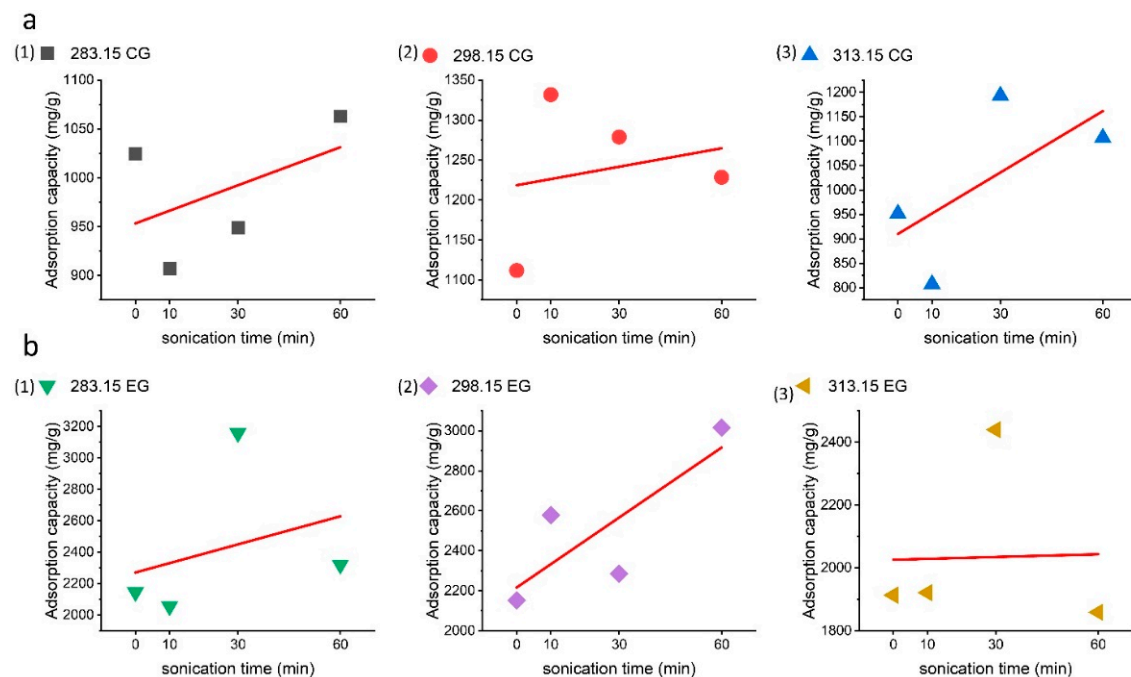

**Figure S3.** Statistics of the adsorption capacities of (a) CG and (b) EG at varying temperatures as a function of ultrasonication time. The kinetics adsorption capacity data collected from the experiments with the initial AO concentration at 100 mg/l were analyzed.
